# Supplementary material for: Structural Analysis of Hand Drawn Bumblebee Bombus terrestris Silk
Source: PubMed Central journal article supplement (PMC4964541; doi:10.3390/ijms17071170), 2016-07-20
Supplement: ijms-17-01170-s001.pdf [file ijms-17-01170-s001.pdf]

# Supplementary Materials: Structural Analysis of Hand Drawn Bumblebee *Bombus terrestris* Silk

Andrea L. Woodhead, Tara D. Sutherland and Jeffrey S. Church

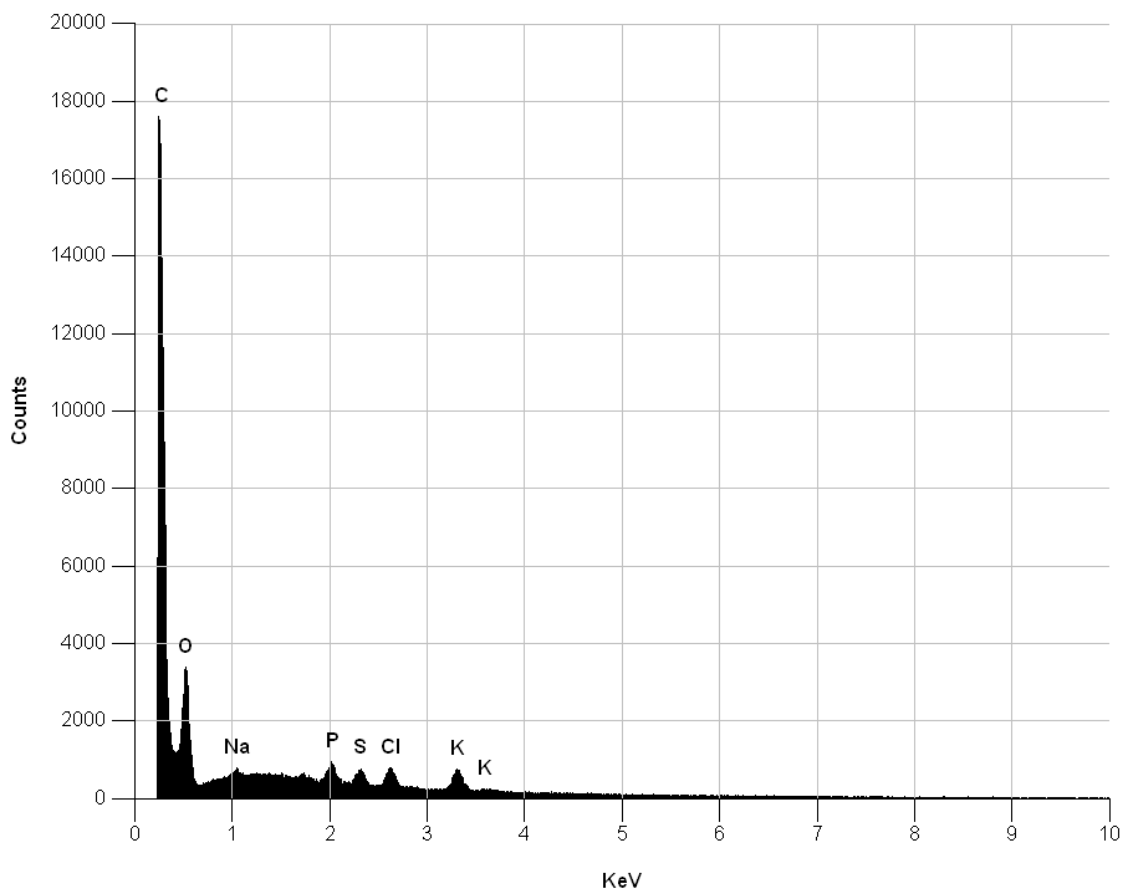

**Figure S1.** EDX spectrum obtained from the *B. terrestris* silk fibre hand drawn at 0.14 cm/s shown as Figure 1a,b.

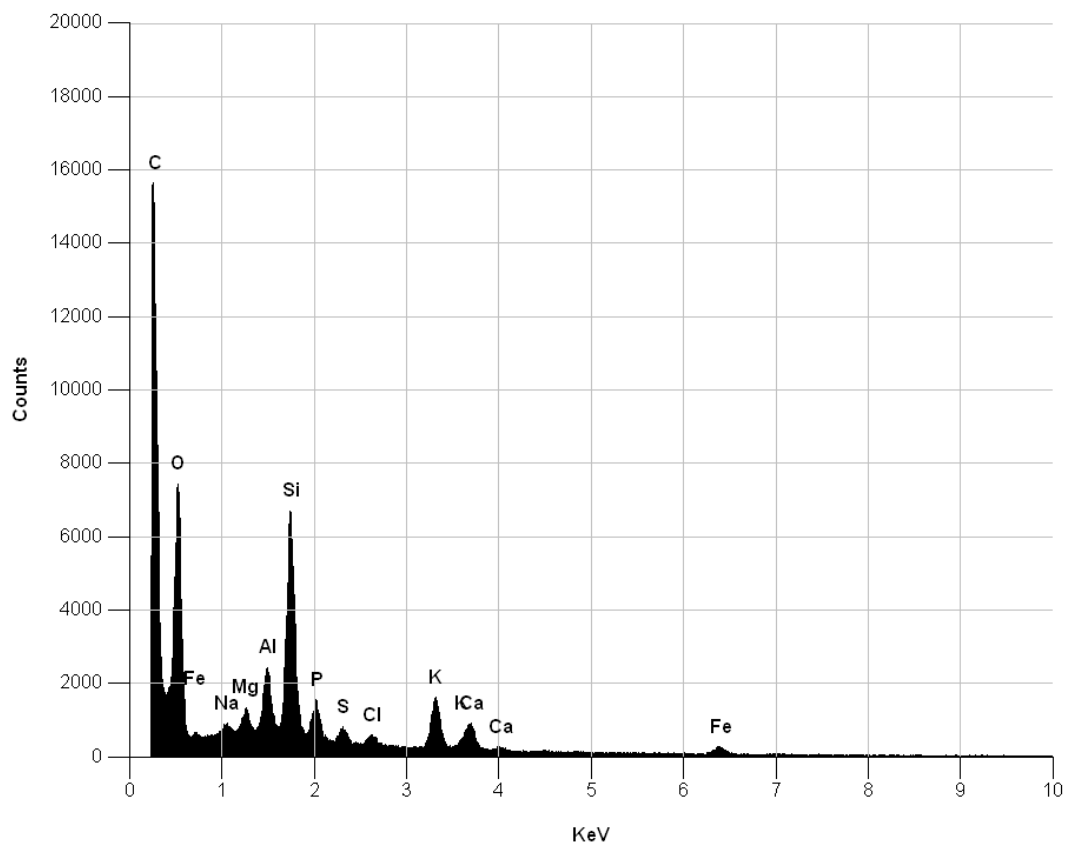

**Figure S2.** EDX spectrum obtained from the *B. terrestris* silk fibre hand drawn at 0.10 cm/s shown as Figure 1c.
